# Supplementary material
Source: Royal Society of Chemistry journal article supplement (doi:10.1039/d6cp01045h)
Supplement: d6cp01045h1.pdf [file d6cp01045h1.pdf]

# Supporting Information

## Designing High-Performance Thermoelectrics through Chalcogen Engineering in InSe-based Layered Materials

Shivani Vinod<sup>1</sup>, Tanu Choudhary<sup>2</sup>, Raju K Biswas<sup>1\*</sup>

<sup>1</sup>Department of Physics, North Eastern Regional Institute of Science and Technology,  
Nirjuli, Arunachal Pradesh 791109, India

<sup>2</sup>Department of Physics, Faculty of Natural Sciences,  
M S Ramaiah University of Applied Sciences, Bengaluru 560058, India

\*E-mail: [rajukumar1718@gmail.com](mailto:rajukumar1718@gmail.com)

**Table S1.** Calculated lattice parameter, bond length, and bond angles of InSe, InS<sub>0.5</sub>Se<sub>0.5</sub>, InS<sub>0.5</sub>Te<sub>0.5</sub> and InSe<sub>0.5</sub>Te<sub>0.5</sub> estimated at PBE level.

| Materials                             | Lattice parameter (Å) | Bond length (Å)                              | Bond angle (deg)                                                                |
|---------------------------------------|-----------------------|----------------------------------------------|---------------------------------------------------------------------------------|
| InSe                                  | 4.04                  | 2.80 (In-In)<br>2.66 (In-Se)                 | 98.53 (In-Se-In)<br>118.95 (In-In-Se)                                           |
| InS <sub>0.5</sub> Se <sub>0.5</sub>  | 3.98                  | 2.80 (In-In)<br>2.56 (In-S)<br>2.64(In-Se)   | 116.00 (In-In-S)<br>119.57 (In-In-Se)<br>102.22 (In-S-In)<br>97.73 (In-Se-In)   |
| InS <sub>0.5</sub> Te <sub>0.5</sub>  | 4.15                  | 2.79 (In-In)<br>2.61 (In-S)<br>2.81(In-Te)   | 113.12 (In-In-S)<br>121.57 (In-In-Te)<br>105.58 (In-S-In)<br>95.09 (In-Te-In)   |
| InSe <sub>0.5</sub> Te <sub>0.5</sub> | 4.24                  | 2.80 (In-In)<br>2.71 (In-Se)<br>2.84 (In-Te) | 115.57 (In-In-Se)<br>120.63 (In-In-Te)<br>102.73 (In-Se-In)<br>96.34 (In-Te-In) |

**Table S2.** Energy separations between the highest and second-highest valence-band extrema (VB1–VB2), and the spacing between two conduction-band valleys ( $C_1$ – $C_2$ ) and valence-band valleys ( $V_1$ – $V_2$ ), for InSe,  $\text{InS}_{0.5}\text{Se}_{0.5}$ ,  $\text{InS}_{0.5}\text{Te}_{0.5}$  and  $\text{InSe}_{0.5}\text{Te}_{0.5}$ . These values quantify the degree of unconventional and conventional band convergence near the band edges, respectively.

|                                          | <b>InSe</b> | <b><math>\text{InS}_{0.5}\text{Se}_{0.5}</math></b> | <b><math>\text{InS}_{0.5}\text{Te}_{0.5}</math></b> | <b><math>\text{InSe}_{0.5}\text{Te}_{0.5}</math></b> |
|------------------------------------------|-------------|-----------------------------------------------------|-----------------------------------------------------|------------------------------------------------------|
| <b>VB1-VB2 (eV)</b>                      | 0.61        | 0.60                                                | 0.54                                                | 0.55                                                 |
| <b><math>C_1</math>-<math>C_2</math></b> | 0.71        | 0.70                                                | 0.74                                                | 0.73                                                 |
| <b><math>V_1</math>-<math>V_2</math></b> | 0.28        | 0.30                                                | 0.37                                                | 0.26                                                 |

**Table S3.** Calculated ICOHP and ICOBI value of InSe and its substituted systems estimated using LOBSTER code.

| <b>System</b>                                        | <b>Atomic pairs</b> | <b>ICOHP (eV)</b> | <b>ICOBI</b> |
|------------------------------------------------------|---------------------|-------------------|--------------|
| <b>InSe</b>                                          | In-In               | -3.89             | 0.79         |
|                                                      | In-Se               | -5.08             | 1.03         |
| <b><math>\text{InS}_{0.5}\text{Se}_{0.5}</math></b>  | In-In               | -3.89             | 0.79         |
|                                                      | In-Se               | -5.19             | 1.03         |
|                                                      | In-S                | -5.24             | 0.99         |
| <b><math>\text{InS}_{0.5}\text{Te}_{0.5}</math></b>  | In-In               | -3.87             | 0.80         |
|                                                      | In-S                | -4.90             | 0.97         |
|                                                      | In-Te               | -4.92             | 1.11         |
| <b><math>\text{InSe}_{0.5}\text{Te}_{0.5}</math></b> | In-In               | -3.86             | 0.81         |
|                                                      | In-Se               | -4.77             | 1.01         |
|                                                      | In-Te               | -4.76             | 1.10         |

**Table S4.** Calculated values of elastic constant ( $C_{3D}$ ), deformation potential constant ( $E_1$ ) effective mass ( $m^*$ ), longitudinal acoustics phonon-limited carrier mobility ( $\mu_{LA}$ ), and relaxation time ( $\tau_{LA}$ ) calculated at 300K. ( $m_0 = 9.1 \times 10^{-31}$  kg)

| Material                              |    | $C_{3D}$<br>( $10^{10}$ N/m) | $E_1$<br>(eV) | $m^*$<br>( $m_0$ ) | $\mu_{LA}$<br>( $\text{cm}^2/\text{Vs}$ ) | $\tau_{LA}$<br>( $10^{-12}$ s) |
|---------------------------------------|----|------------------------------|---------------|--------------------|-------------------------------------------|--------------------------------|
| InSe                                  | CB | 3.85                         | 4.14          | 0.19               | 8247                                      | 0.89                           |
|                                       | VB |                              | 1.47          | 0.59               | 3849                                      | 1.29                           |
| InS <sub>0.5</sub> Se <sub>0.5</sub>  | CB | 3.06                         | 6.48          | 0.12               | 8440                                      | 0.57                           |
|                                       | VB |                              | 4.16          | 0.56               | 435                                       | 0.13                           |
| InS <sub>0.5</sub> Te <sub>0.5</sub>  | CB | 3.68                         | 1.21          | 0.18               | 105641                                    | 10.81                          |
|                                       | VB |                              | 1.28          | 0.53               | 6345                                      | 1.91                           |
| InSe <sub>0.5</sub> Te <sub>0.5</sub> | CB | 4.02                         | 4.26          | 0.18               | 9310                                      | 0.9                            |
|                                       | VB |                              | 4.47          | 0.51               | 625                                       | 0.18                           |

**Table S5.** Calculated carrier concentration (n), mobility ( $\mu$ ) and electrical conductivity ( $\sigma$ ) data for InSe-based bulk systems over a temperature range of 300 K to 600 K.

| Temperature |    | InSe                                         |                              |                  | InS <sub>0.5</sub> Se <sub>0.5</sub>         |                              |                  | InS <sub>0.5</sub> Te <sub>0.5</sub>         |                              |                  | InSe <sub>0.5</sub> Te <sub>0.5</sub>        |                              |                  |
|-------------|----|----------------------------------------------|------------------------------|------------------|----------------------------------------------|------------------------------|------------------|----------------------------------------------|------------------------------|------------------|----------------------------------------------|------------------------------|------------------|
|             |    | n<br>(cm <sup>-3</sup> )<br>10 <sup>16</sup> | $\mu$<br>cm <sup>2</sup> /Vs | $\sigma$<br>S/cm | n<br>(cm <sup>-3</sup> )<br>10 <sup>17</sup> | $\mu$<br>cm <sup>2</sup> /Vs | $\sigma$<br>S/cm | n<br>(cm <sup>-3</sup> )<br>10 <sup>18</sup> | $\mu$<br>cm <sup>2</sup> /Vs | $\sigma$<br>S/cm | n<br>(cm <sup>-3</sup> )<br>10 <sup>18</sup> | $\mu$<br>cm <sup>2</sup> /Vs | $\sigma$<br>S/cm |
| 300         | CB | 8                                            | 1995                         | 25.54            | 3.0                                          | 1337                         | 64.18            | 1.5                                          | 1506                         | 361.4            | 2.0                                          | 1790                         | 572.8            |
|             | VB |                                              | 694                          | 8.88             |                                              | 190                          | 9.12             |                                              | 479                          | 115.0            |                                              | 347                          | 111.0            |
| 350         | CB | 10                                           | 1877                         | 30.03            | 5.0                                          | 1284                         | 102.7            | 1.8                                          | 1501                         | 432.3            | 2.6                                          | 1705                         | 709.3            |
|             | VB |                                              | 663                          | 10.61            |                                              | 171                          | 13.68            |                                              | 470                          | 135.4            |                                              | 303                          | 126.0            |
| 400         | CB | 15                                           | 1765                         | 42.36            | 6.0                                          | 1232                         | 118.3            | 2.1                                          | 1495                         | 502.3            | 3.4                                          | 1622                         | 882.4            |
|             | VB |                                              | 633                          | 15.19            |                                              | 154                          | 14.78            |                                              | 461                          | 154.9            |                                              | 267                          | 145.2            |
| 450         | CB | 20                                           | 1661                         | 53.15            | 7.0                                          | 1181                         | 132.3            | 2.4                                          | 1488                         | 571.4            | 4.0                                          | 1542                         | 986.9            |
|             | VB |                                              | 603                          | 19.30            |                                              | 139                          | 15.57            |                                              | 451                          | 173.2            |                                              | 237                          | 151.7            |
| 500         | CB | 25                                           | 1561                         | 62.44            | 8.0                                          | 1131                         | 144.8            | 2.7                                          | 1482                         | 640.2            | 4.6                                          | 1465                         | 1078             |
|             | VB |                                              | 575                          | 23.00            |                                              | 126                          | 16.13            |                                              | 441                          | 190.5            |                                              | 211                          | 155.3            |
| 550         | CB | 30                                           | 1469                         | 70.51            | 9.0                                          | 1083                         | 156.0            | 3.0                                          | 1475                         | 708.0            | 5.4                                          | 1393                         | 1204             |
|             | VB |                                              | 548                          | 26.30            |                                              | 115                          | 16.56            |                                              | 431                          | 206.9            |                                              | 190                          | 164.2            |
| 600         | CB | 35                                           | 1383                         | 77.45            | 10.0                                         | 1037                         | 165.9            | 3.5                                          | 1468                         | 822.1            | 6.0                                          | 1324                         | 1271             |
|             | VB |                                              | 522                          | 29.23            |                                              | 105                          | 17.0             |                                              | 421                          | 235.8            |                                              | 172                          | 165.1            |

**Table S6.** Calculated Seebeck coefficient (S), lattice thermal conductivity ( $\kappa_l$ ), and electronic thermal conductivity ( $\kappa_e$ ) data for InSe, InS<sub>0.5</sub>Se<sub>0.5</sub>, InS<sub>0.5</sub>Te<sub>0.5</sub> and InSe<sub>0.5</sub>Te<sub>0.5</sub> over a temperature range of 300 K to 600 K.

| Temperature |    | InSe      |                        |                                           | InS <sub>0.5</sub> Se <sub>0.5</sub> |                        |                                               | InS <sub>0.5</sub> Te <sub>0.5</sub> |                        |                                               | InSe <sub>0.5</sub> Te <sub>0.5</sub> |                        |                                               |
|-------------|----|-----------|------------------------|-------------------------------------------|--------------------------------------|------------------------|-----------------------------------------------|--------------------------------------|------------------------|-----------------------------------------------|---------------------------------------|------------------------|-----------------------------------------------|
|             |    | S<br>μV/K | $\kappa_l$<br>W/m<br>K | $\kappa_e$<br>W/mK<br>(10 <sup>-5</sup> ) | S<br>μV/K                            | $\kappa_l$<br>W/m<br>K | $\kappa_e$<br>W/m<br>K<br>(10 <sup>-5</sup> ) | S<br>μV/<br>K                        | $\kappa_l$<br>W/m<br>K | $\kappa_e$<br>W/m<br>K<br>(10 <sup>-4</sup> ) | S<br>μV/<br>K                         | $\kappa_l$<br>W/m<br>K | $\kappa_e$<br>W/m<br>K<br>(10 <sup>-5</sup> ) |
| 300         | CB | 1014      | 1.71                   | 18                                        | 3.59                                 | 47                     | 2.47                                          | 448                                  | 265                    | 375                                           | 2.00                                  | 421                    |                                               |
|             | VB | 933       |                        | 6                                         |                                      | 862                    |                                               | 7                                    |                        |                                               |                                       | 556                    | 84                                            |
| 350         | CB | 897       | 1.46                   | 25                                        | 3.08                                 | 88                     | 2.11                                          | 383                                  | 370                    | 321                                           | 1.72                                  | 608                    |                                               |
|             | VB | 798       |                        | 9                                         |                                      | 751                    |                                               | 11                                   |                        |                                               |                                       | 486                    | 116                                           |
| 400         | CB | 805       | 1.28                   | 41                                        | 2.70                                 | 115                    | 1.84                                          | 337                                  | 492                    | 284                                           | 1.52                                  | 864                    |                                               |
|             | VB | 701       |                        | 14                                        |                                      | 666                    |                                               | 14                                   |                        |                                               |                                       | 434                    | 151                                           |
| 450         | CB | 732       | 1.14                   | 58                                        | 2.40                                 | 145                    | 1.64                                          | 302                                  | 629                    | 256                                           | 1.34                                  | 1088                   |                                               |
|             | VB | 619       |                        | 21                                        |                                      | 602                    |                                               | 17                                   |                        |                                               |                                       | 393                    | 190                                           |
| 500         | CB | 673       | 1.02                   | 61                                        | 2.17                                 | 177                    | 1.48                                          | 275                                  | 784                    | 234                                           | 1.20                                  | 1320                   |                                               |
|             | VB | 557       |                        | 28                                        |                                      | 548                    |                                               | 19                                   |                        |                                               |                                       | 364                    | 233i                                          |
| 550         | CB | 621       | 0.93                   | 95                                        | 1.97                                 | 210                    | 1.34                                          | 255                                  | 954                    | 215                                           | 1.09                                  | 1622                   |                                               |
|             | VB | 507       |                        | 35                                        |                                      | 506                    |                                               | 22                                   |                        |                                               |                                       | 340                    | 278                                           |
| 600         | CB | 585       | 0.85                   | 113                                       | 1.81                                 | 243                    | 1.23                                          | 235                                  | 1208                   | 201                                           | 1.00                                  | 1868                   |                                               |
|             | VB | 466       |                        | 42                                        |                                      | 473                    |                                               | 24                                   |                        |                                               |                                       | 319                    | 346                                           |

**Table S7.** Calculated Specific heat ( $C_v$ ) data for InSe, InS<sub>0.5</sub>Se<sub>0.5</sub>, InS<sub>0.5</sub>Te<sub>0.5</sub> and InSe<sub>0.5</sub>Te<sub>0.5</sub> over a temperature range of 300 K to 600 K.

| $C_v$ (10 <sup>6</sup> J/m <sup>3</sup> K) |      |                                      |                                      |                                       |
|--------------------------------------------|------|--------------------------------------|--------------------------------------|---------------------------------------|
| Temperature                                | InSe | InS <sub>0.5</sub> Se <sub>0.5</sub> | InS <sub>0.5</sub> Te <sub>0.5</sub> | InSe <sub>0.5</sub> Te <sub>0.5</sub> |
| 300K                                       | 1.29 | 1.40                                 | 1.27                                 | 1.22                                  |
| 350K                                       | 1.30 | 1.42                                 | 1.28                                 | 1.23                                  |
| 400K                                       | 1.31 | 1.43                                 | 1.29                                 | 1.24                                  |
| 450K                                       | 1.32 | 1.44                                 | 1.30                                 | 1.24                                  |
| 500K                                       | 1.32 | 1.45                                 | 1.31                                 | 1.25                                  |
| 550K                                       | 1.33 | 1.46                                 | 1.31                                 | 1.25                                  |
| 600K                                       | 1.33 | 1.46                                 | 1.31                                 | 1.25                                  |

**Table S8.** Calculated power factor (PF) and figure of merit (ZT) data for InSe, InS<sub>0.5</sub>Se<sub>0.5</sub>, InS<sub>0.5</sub>Te<sub>0.5</sub> and InSe<sub>0.5</sub>Te<sub>0.5</sub> over a temperature range of 300 K to 600 K.

| Temperature |    | InSe                  |      | InS <sub>0.5</sub> Se <sub>0.5</sub> |      | InS <sub>0.5</sub> Te <sub>0.5</sub> |      | InSe <sub>0.5</sub> Te <sub>0.5</sub> |      |
|-------------|----|-----------------------|------|--------------------------------------|------|--------------------------------------|------|---------------------------------------|------|
|             |    | PF(10 <sup>-4</sup> ) | ZT   | PF(10 <sup>-4</sup> )                | ZT   | PF(10 <sup>-4</sup> )                | ZT   | PF(10 <sup>-4</sup> )                 | ZT   |
| 300         | CB | 26.26                 | 0.46 | 36.39                                | 0.30 | 72.53                                | 0.88 | 80.55                                 | 1.20 |
|             | VB | 7.72                  | 0.13 | 6.77                                 | 0.05 | 35.55                                | 0.43 | 25.14                                 | 0.37 |
| 350         | CB | 24.16                 | 0.58 | 41.80                                | 0.47 | 63.41                                | 1.05 | 73.08                                 | 1.48 |
|             | VB | 6.75                  | 0.16 | 7.71                                 | 0.08 | 31.98                                | 0.53 | 22.33                                 | 0.45 |
| 400         | CB | 27.45                 | 0.86 | 36.43                                | 0.54 | 57.04                                | 1.24 | 71.17                                 | 1.87 |
|             | VB | 7.46                  | 0.23 | 6.55                                 | 0.09 | 29.17                                | 0.63 | 21.29                                 | 0.56 |
| 450         | CB | 28.47                 | 1.12 | 31.76                                | 0.59 | 52.11                                | 1.43 | 64.67                                 | 2.17 |
|             | VB | 7.39                  | 0.29 | 5.64                                 | 0.10 | 26.75                                | 0.73 | 18.68                                 | 0.62 |
| 500         | CB | 28.28                 | 1.38 | 28.28                                | 0.65 | 48.39                                | 1.63 | 59.02                                 | 2.45 |
|             | VB | 7.13                  | 0.35 | 4.84                                 | 0.11 | 25.24                                | 0.85 | 16.80                                 | 0.70 |
| 550         | CB | 27.19                 | 1.61 | 25.21                                | 0.70 | 35.84                                | 1.88 | 55.65                                 | 2.80 |
|             | VB | 6.76                  | 0.39 | 42.39                                | 0.12 | 23.91                                | 0.98 | 15.67                                 | 0.79 |
| 600         | CB | 26.50                 | 1.87 | 22.58                                | 0.74 | 45.40                                | 2.21 | 51.34                                 | 3.08 |
|             | VB | 6.34                  | 0.45 | 3.80                                 | 0.13 | 23.99                                | 1.17 | 14.07                                 | 0.84 |

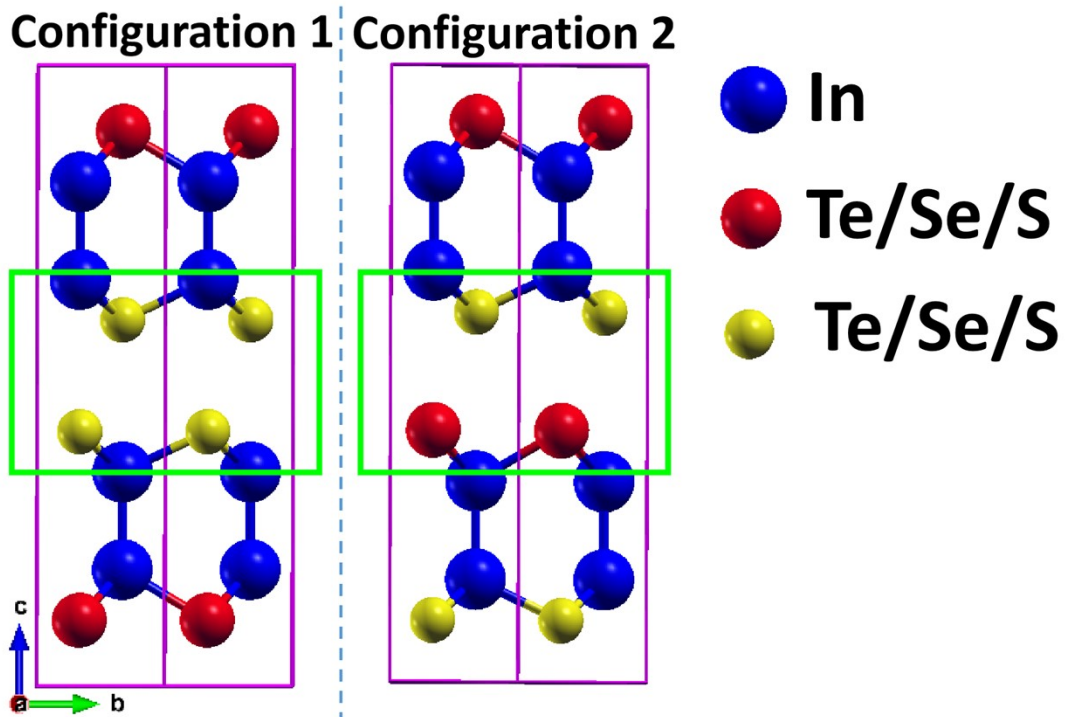

**Fig. S1.** Schematic illustration of the two possible stacking configurations of the chalcogen-substituted bulk structures. The green rectangular box highlights the interlayer van der Waals interface separating adjacent layers.

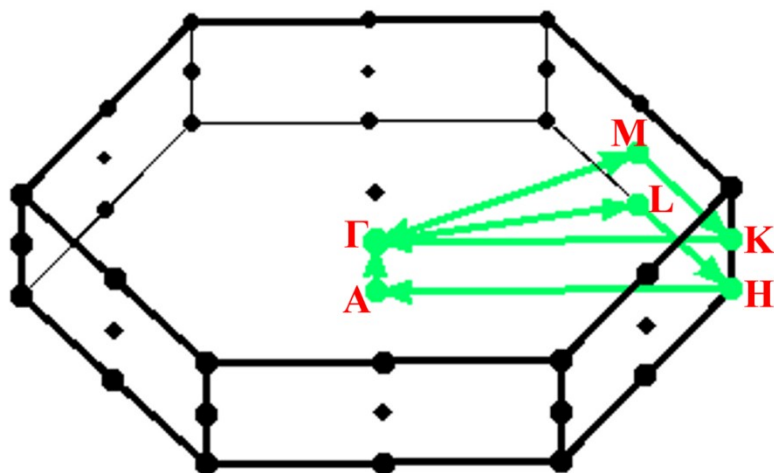

**Fig. S2.** Schematic representation of high symmetry points ( $\Gamma - M - K - \Gamma - L - H - A$ ) in the hexagonal Brillouin zone (BZ) of all four systems.

### Note S1

The strength of SOC is fundamentally governed by the atomic number  $Z$  of the constituent elements, scaling approximately as  $Z^4$ , such that heavier atoms are expected to exhibit progressively stronger relativistic effects<sup>59, 60</sup>. In the present InSe-based series, the substitution of Se by the lighter S atom ( $Z = 16$ ) in  $\text{InS}_{0.5}\text{Se}_{0.5}$  is expected to marginally reduce the overall SOC strength relative to pristine InSe (Se,  $Z = 34$ ), whereas replacement by the heavier Te atom ( $Z = 52$ ) in  $\text{InSe}_{0.5}\text{Te}_{0.5}$  and  $\text{InS}_{0.5}\text{Te}_{0.5}$  introduces a heavier chalcogen species that could in principle enhance relativistic contributions. However, despite this trend, the magnitude of SOC-induced changes remains uniformly small across all four compositions, with band-gap reductions not exceeding 0.01 eV in any system. This behavior is fully consistent with the fact that all constituent elements in these materials, namely Indium ( $Z = 49$ ), Sulfur ( $Z = 16$ ), Selenium ( $Z = 34$ ), and Tellurium ( $Z = 52$ ), belong to the p-block of the periodic table, for which spin-orbit interactions are governed primarily by intra-atomic p-orbital coupling.<sup>84, 85</sup> Although Te is substantially heavier than S and Se, its 5p orbitals participate in bonding interactions that partially delocalize the spin-orbit interaction across the lattice, reducing its localized impact on band-edge states. In contrast, compounds containing heavy d- or f-block elements, where SOC arises from strongly localized and energetically proximate d or f orbitals, typically exhibit far more pronounced relativistic band modifications, including large band splittings, significant band-gap renormalization, and substantial changes in band curvature.<sup>84, 85</sup> Since the electronic transport properties in the present systems depend primarily on band dispersion and carrier effective mass, both of which remain unaffected by SOC across the entire compositional series, spin-orbit coupling is excluded from all subsequent transport calculations without any loss of physical accuracy.

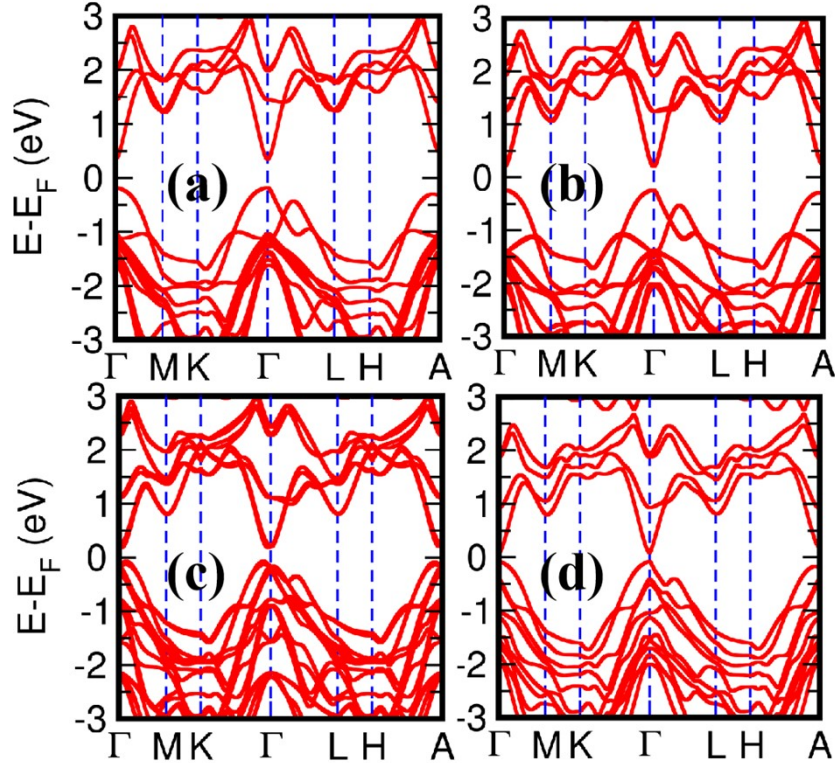

**Fig. S3.** Electronic band structure with SOC for (a) InSe, (b)  $\text{InS}_{0.5}\text{Se}_{0.5}$ , (c)  $\text{InS}_{0.5}\text{Te}_{0.5}$  and (d)  $\text{InSe}_{0.5}\text{Te}_{0.5}$ , respectively.

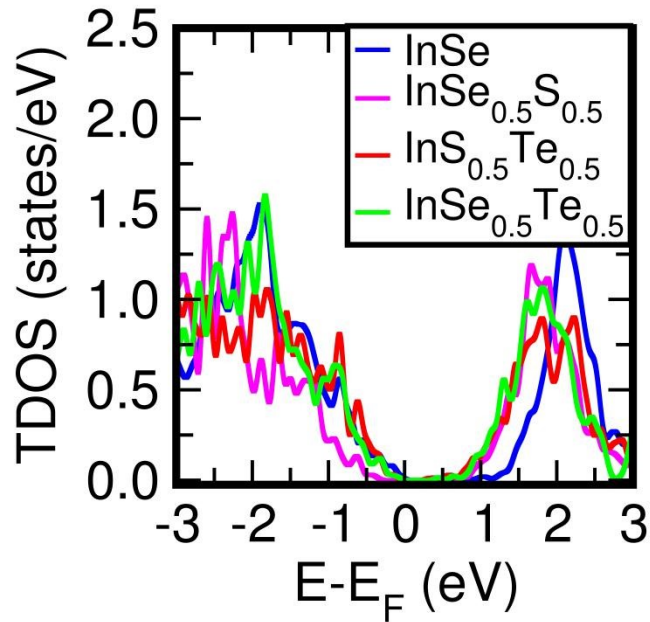

**Fig. S4.** Total density of states (TDOS) of InSe, InS<sub>0.5</sub>Se<sub>0.5</sub>, InS<sub>0.5</sub>Te<sub>0.5</sub> and InSe<sub>0.5</sub>Te<sub>0.5</sub>.

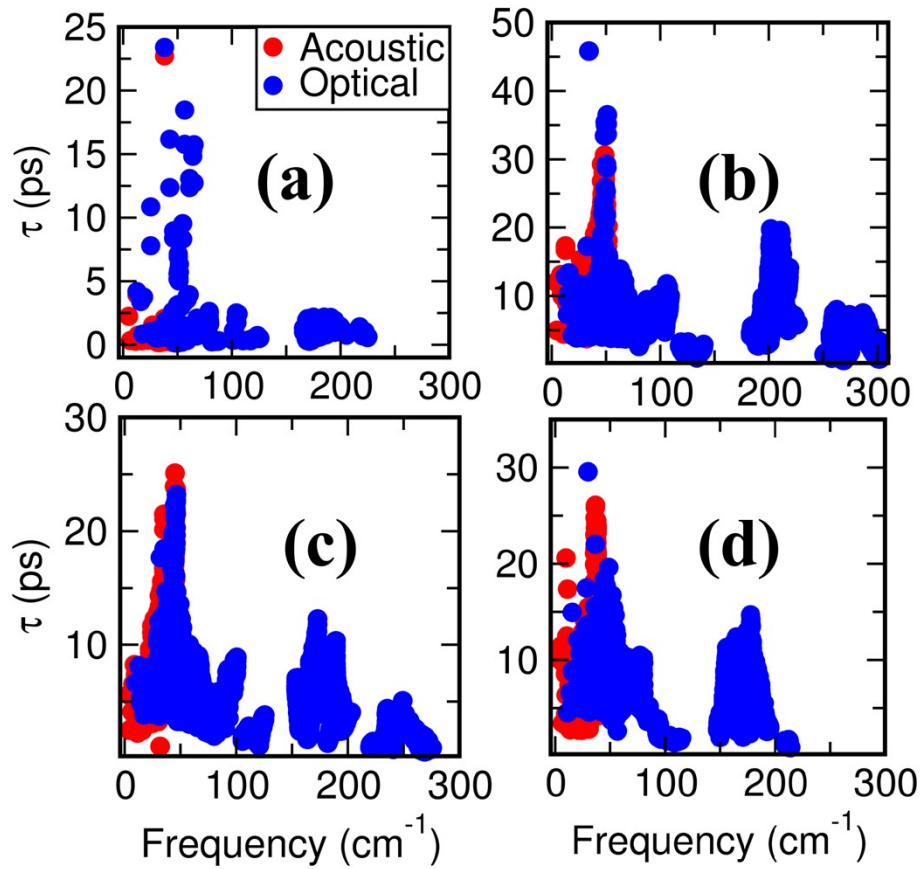

**Fig. S5.** Calculated phonon lifetime ( $\tau$ ) for (a) InSe, (b) InS<sub>0.5</sub>Se<sub>0.5</sub>, (c) InS<sub>0.5</sub>Te<sub>0.5</sub> and (d) InSe<sub>0.5</sub>Te<sub>0.5</sub>, respectively.
